# Supplementary material
Source: PubMed Central journal article supplement (PMC3605952)

## SUPPLEMENTARY DATA

FIG. S1. Comparison of mean cell wall thickness ( $\pm$  s.e.) of adjoining bundle sheath and mesophyll walls in three  $C_4$  Sesuvioideae species (*Trianthema portulacastrum*, *T. sheilae*, *Zaleya pentandra*;  $n = 40$  per species). Letters indicate statistically significant differences at  $P < 0.05$ .

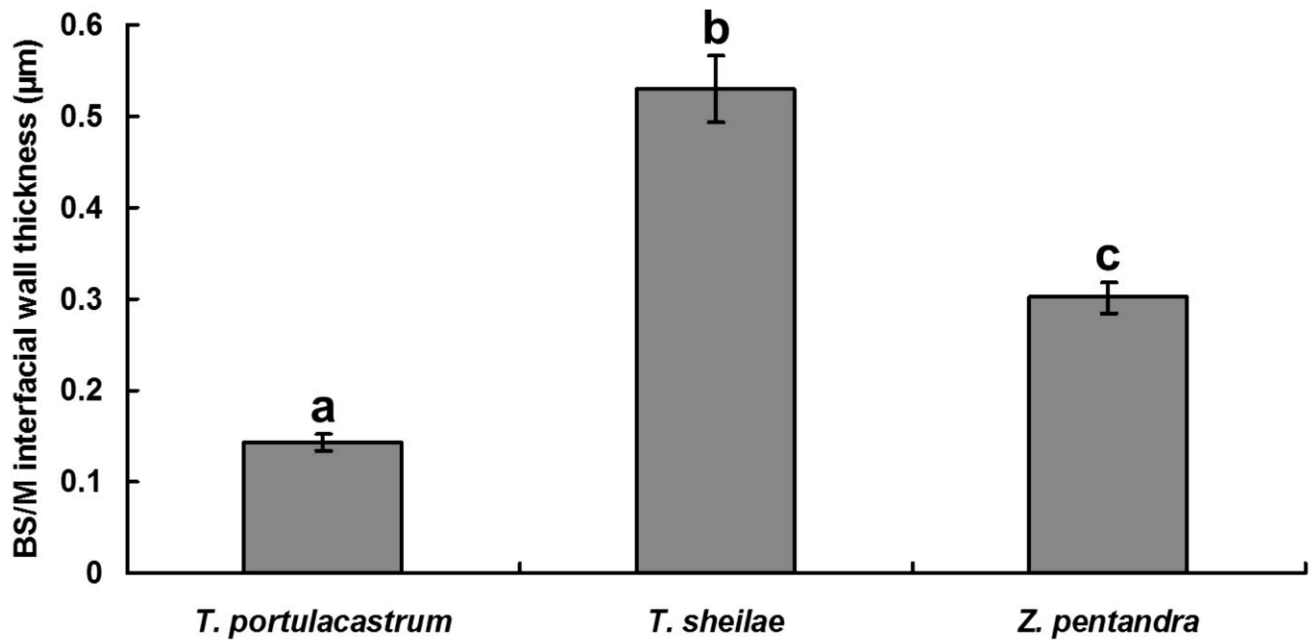

FIG. S2. Transmission electron micrographs of leaf blade cross-sections showing numerous plasmodesmata traversing adjoining mesophyll and bundle sheath walls in primary pit fields. (A) *Trianthema portulacastrum*; (B) *Trianthema sheilae*; (C) *Zaleya pentandra*. Abbreviations: BS, bundle sheath; M, mesophyll; Pd, plasmodesmata; PPF, primary pit field. Scale bars (A): = 0.4  $\mu\text{m}$ ; (B) = 0.5  $\mu\text{m}$ ; (C) = 0.1  $\mu\text{m}$ .

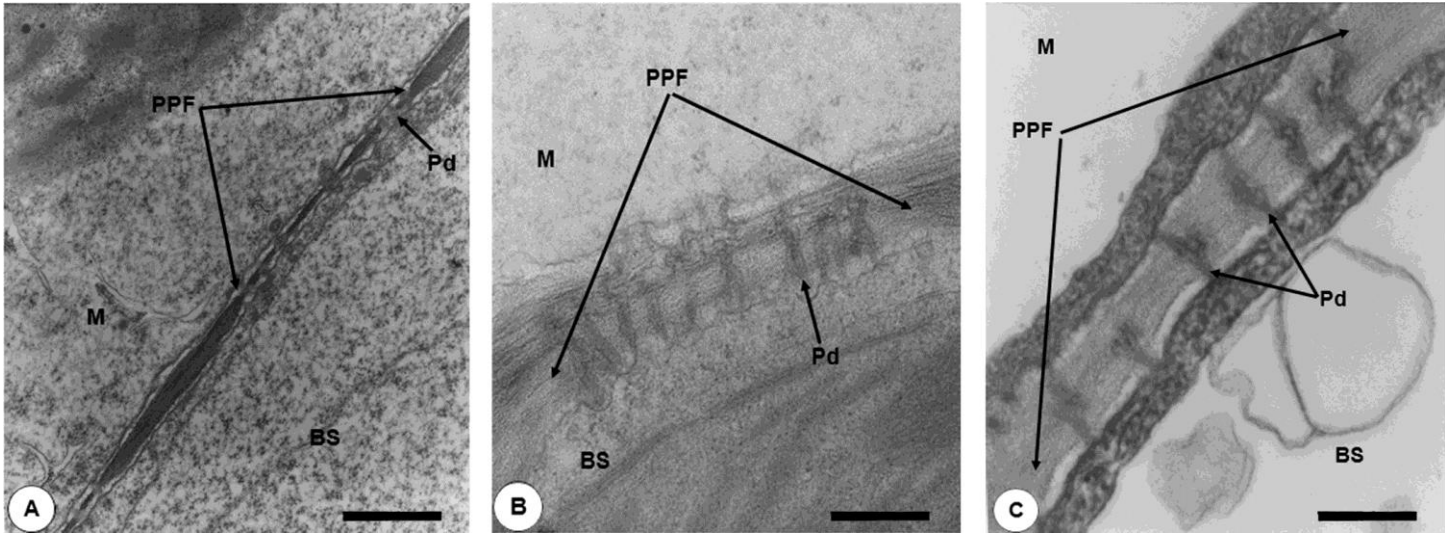

FIG. 3. Light micrographs of *in situ* immunolocalizations of PEP-CK in cross-sections through leaves of comparison C<sub>4</sub> species and *Trianthema sheilae*. Tissue-specific immunolabelling of PEP-CK is indicated by the brown precipitate. (A) PEP-CK *Melinis minutiflora*; (B) NAD-ME *Cleome gynandra*; (C, D) NAD-ME *Trianthema sheilae*. Scale bars = 100  $\mu$ m.

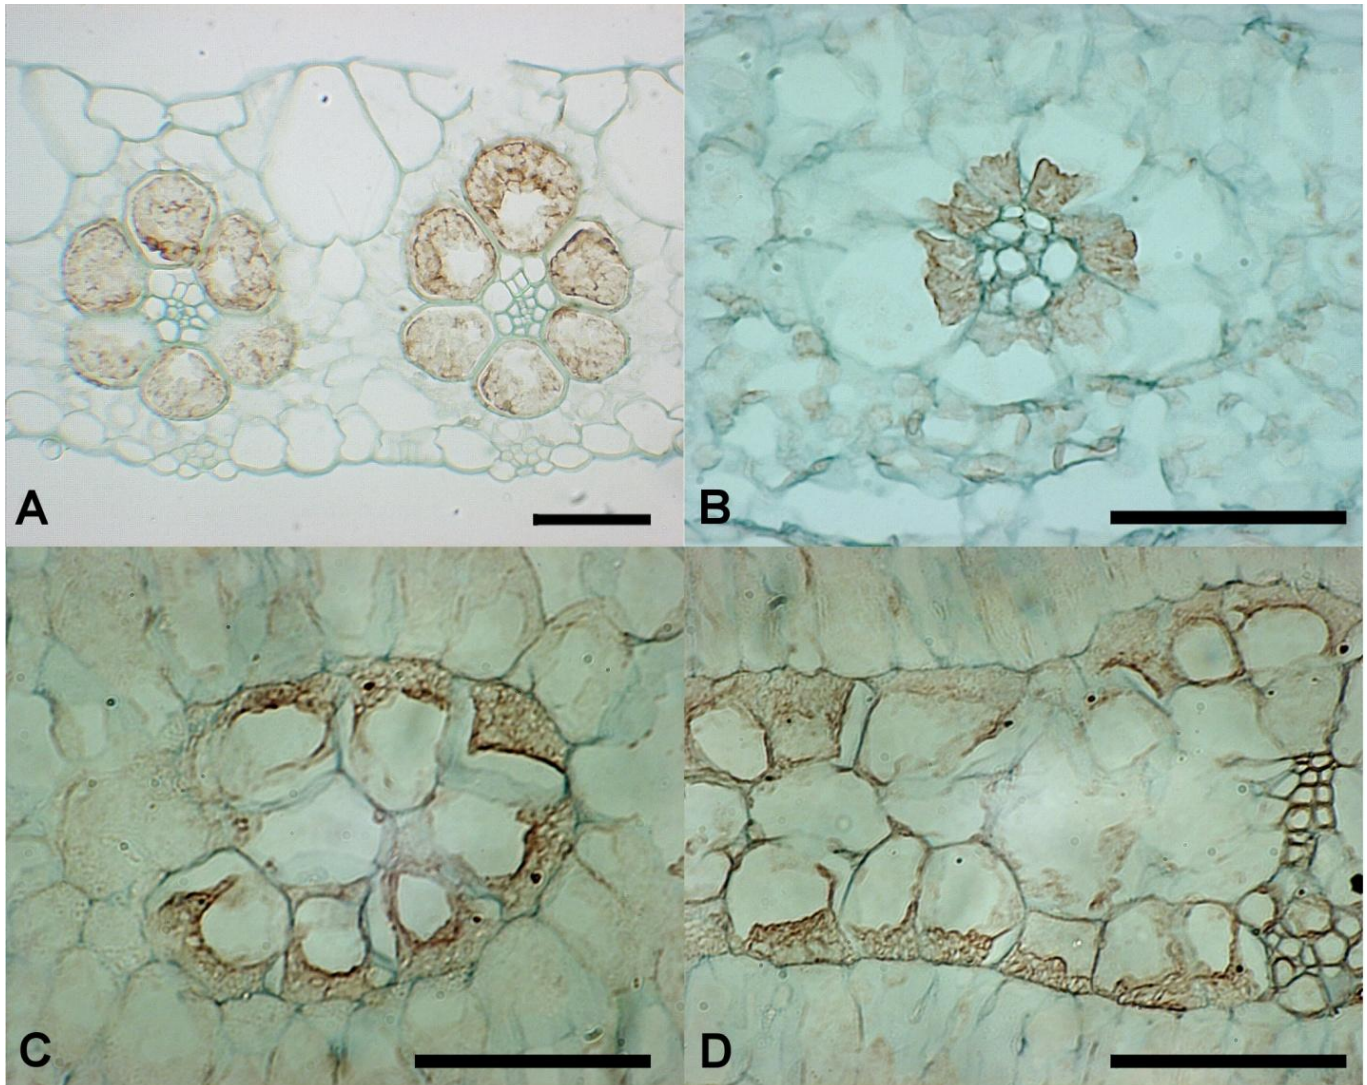

Supplement: supp_mct017_mct017supp.pdf [file supp_mct017_mct017supp.pdf]
